# Supplementary material
Source: PubMed Central journal article supplement (PMC10071742)
Supplement: 41512_2023_144_MOESM1_ESM.pdf [file 41512_2023_144_MOESM1_ESM.pdf]

## Supplementary file 1: Description of excluded prognostic models

Five models were excluded from this validation study due to the unavailability of certain predictors in the validation cohorts and two models were excluded because they express the risk of mortality qualitatively rather than as a risk prediction. The details of these models and the reason for their exclusion are listed in the table below.

**Supplementary Table 1:** Characteristics of candidate prognostic models for COVID-19 not included in current external validation study

| <b>Model Name</b>                                                | <b>Pre-existing or COVID-Specific</b>  | <b>Model Outcome</b> | <b>Reason for exclusion</b>                                                                             |
|------------------------------------------------------------------|----------------------------------------|----------------------|---------------------------------------------------------------------------------------------------------|
| <b>Q-COVID<br/>(Two models separately for males and females)</b> | COVID-specific                         | Mortality            | Information on Townsend deprivation index, ethnicity, and domicile not available in validation cohorts. |
| <b>PRIEST</b>                                                    | COVID-specific                         | Mortality            | Information on performance status and major organ support not available in most validation cohorts.     |
| <b>CUCAF-SF</b>                                                  | COVID-specific                         | Mortality            | Information on consolidation on chest radiography not available in most validation cohorts.             |
| <b>CUCA-SF</b>                                                   | COVID-specific                         | Mortality            | Information on consolidation on chest radiography not available in most validation cohorts.             |
| <b>NEWS</b>                                                      | Pre-existing risk stratification score | Mortality            | Express risk of mortality qualitatively rather than as a risk prediction.                               |
| <b>qSOFA</b>                                                     | Pre-existing risk stratification score | Mortality            | Express risk of mortality qualitatively rather than as a risk prediction.                               |
