# Supplementary material
Source: PubMed Central journal article supplement (PMC10071742)
Supplement: 41512_2023_144_MOESM2_ESM.pdf [file 41512_2023_144_MOESM2_ESM.pdf]

## Supplementary file 2: Prediction models and risk scores

The details of the eight prognostic models selected for the external validation study are described in this section. This includes the model equations or score tables, approximated mortality risks, comparison tables between derivation and validation settings, and model development study references.

### 1) GAL-COVID-19 mortality model

#### Model equation

Logit(mortality) =  $-9.522 + 0.095 \times \text{age} + 0.889 \times \text{sex} + 1.463 \times \text{lymphoma/leukemia} + 0.703 \times \text{liver disease} + 0.495 \times \text{ischemic heart disease} + 0.564 \times \text{dementia} + 0.548 \times \text{Chronic obstructive pulmonary disease} + 0.613 \times \text{Diabetes} - 0.828 \times \text{Chronic kidney disease}$

#### Comparison between derivation and validation settings

|                                              | Derivation settings                                                                                                          | Validation hospital cohorts                                                                                                            |                                                                                                                                        |                                                                                                                                        |
|----------------------------------------------|------------------------------------------------------------------------------------------------------------------------------|----------------------------------------------------------------------------------------------------------------------------------------|----------------------------------------------------------------------------------------------------------------------------------------|----------------------------------------------------------------------------------------------------------------------------------------|
|                                              |                                                                                                                              | CliniCo                                                                                                                                | COVID-OLD                                                                                                                              | COVID-Predict                                                                                                                          |
| <b>Country</b>                               | Galicia, Spain                                                                                                               | The Netherlands                                                                                                                        | The Netherlands                                                                                                                        | The Netherlands                                                                                                                        |
| <b>Healthcare setting</b>                    | Primary care                                                                                                                 | Hospital                                                                                                                               | Hospital                                                                                                                               | Hospital                                                                                                                               |
| <b>Population</b>                            | <ul style="list-style-type: none"> <li>Adults (<math>\geq 18</math> years)</li> <li>Confirmed COVID -19 diagnosis</li> </ul> | <ul style="list-style-type: none"> <li>Older population (<math>\geq 70</math> years)</li> <li>Confirmed COVID -19 diagnosis</li> </ul> | <ul style="list-style-type: none"> <li>Older population (<math>\geq 70</math> years)</li> <li>Confirmed COVID -19 diagnosis</li> </ul> | <ul style="list-style-type: none"> <li>Older population (<math>\geq 70</math> years)</li> <li>Confirmed COVID -19 diagnosis</li> </ul> |
| <b>Predicted outcome and time of horizon</b> | Mortality (prediction horizon not reported)                                                                                  | In-hospital mortality                                                                                                                  | In-hospital mortality                                                                                                                  | In-hospital mortality                                                                                                                  |

  

|                                              | Derivation settings                                                                                                          | Validation primary care and nursing home cohorts                                                                                       |                                                                                                                                        |                                                                                                                                        |
|----------------------------------------------|------------------------------------------------------------------------------------------------------------------------------|----------------------------------------------------------------------------------------------------------------------------------------|----------------------------------------------------------------------------------------------------------------------------------------|----------------------------------------------------------------------------------------------------------------------------------------|
|                                              |                                                                                                                              | JHN, ANH, and AHA                                                                                                                      | PHARMO                                                                                                                                 | YSIS                                                                                                                                   |
| <b>Country</b>                               | United Kingdom                                                                                                               | The Netherlands                                                                                                                        | The Netherlands                                                                                                                        | The Netherlands                                                                                                                        |
| <b>Healthcare setting</b>                    | Primary care                                                                                                                 | Primary care                                                                                                                           | Primary care                                                                                                                           | Nursing home                                                                                                                           |
| <b>Population</b>                            | <ul style="list-style-type: none"> <li>Adults (<math>\geq 18</math> years)</li> <li>Confirmed COVID -19 diagnosis</li> </ul> | <ul style="list-style-type: none"> <li>Older population (<math>\geq 70</math> years)</li> <li>Confirmed COVID -19 diagnosis</li> </ul> | <ul style="list-style-type: none"> <li>Older population (<math>\geq 70</math> years)</li> <li>Confirmed COVID -19 diagnosis</li> </ul> | <ul style="list-style-type: none"> <li>Older population (<math>\geq 70</math> years)</li> <li>Confirmed COVID -19 diagnosis</li> </ul> |
| <b>Predicted outcome and time of horizon</b> | Mortality (prediction horizon not reported)                                                                                  | 28-day mortality                                                                                                                       | 28-day mortality                                                                                                                       | 28-day mortality                                                                                                                       |

## Reference

Francisco Gude-Sampedro , Carmen Fernández-Merino, Lucía Ferreiro, Óscar Lado-Baleato, Jenifer Espasandín-Domínguez, Xurxo Hervada 7 , Carmen M Cadarso 6 , Luis Valdés. Development and validation of a prognostic model based on comorbidities to predict COVID-19 severity: a population-based study. International Journal of Epidemiology. 2021 Mar 3;50(1):64-74. DOI: 10.1093/ije/dyaa209 <https://pubmed.ncbi.nlm.nih.gov/33349845/>

## **2) 4C Mortality Score**

### Score calculation

In-hospital mortality score = 2 x age 50 to 59 + 4 x age 60 to 69 + 6 x age 70 to 79 + 7 x age > 80 + 1 x male + 1 x one comorbidity + 2 x multiple comorbidities + 1 x respiratory rate (breath/minute) 20 to 29 + 2 x respiratory rate (breath/minute)  $\geq$  30 + 2 x oxygen saturation on room air (%) <92 + 2 x Glasgow coma scale < 15 + urea (mmol/L) 7 to 14 + 3 x urea (mmol/L) >14 + 1 x C-reactive protein (mg/L) 50 to 99 + 2 x C-reactive protein (mg/L)  $\geq$  100)

Comorbidities assessed: Chronic cardiac disease, chronic respiratory disease (excluding asthma), chronic renal disease (estimated glomerular filtration rate  $\leq$ 30), liver disease (moderate to severe), dementia, chronic neurological conditions, connective tissue disease, diabetes, acquired immunodeficiency virus/ Human immunodeficiency virus, malignancy, obesity (clinically defined).

### Approximated in-hospital mortality risks

| <b>4C Mortality Score</b> | <b>Mortality risk (%)</b> |
|---------------------------|---------------------------|
| <b>0</b>                  | 0.001                     |
| <b>1</b>                  | 0.3                       |
| <b>2</b>                  | 0.8                       |
| <b>3</b>                  | 2.3                       |
| <b>4</b>                  | 4.8                       |
| <b>5</b>                  | 7.5                       |
| <b>6</b>                  | 7.8                       |
| <b>7</b>                  | 11.7                      |
| <b>8</b>                  | 14.4                      |
| <b>9</b>                  | 19.2                      |
| <b>10</b>                 | 22.9                      |
| <b>11</b>                 | 26.9                      |
| <b>12</b>                 | 32.9                      |

|    |      |
|----|------|
| 13 | 40.1 |
| 14 | 44.6 |
| 15 | 51.6 |
| 16 | 59.1 |
| 17 | 66.1 |
| 18 | 75.8 |
| 19 | 77.4 |
| 20 | 82.9 |
| 21 | 87.5 |

### Comparison between derivation and validation settings

|                                              | Derivation settings                                                                                         | Validation hospital cohorts                                                                                           |                                                                                                                       |                                                                                                                       |
|----------------------------------------------|-------------------------------------------------------------------------------------------------------------|-----------------------------------------------------------------------------------------------------------------------|-----------------------------------------------------------------------------------------------------------------------|-----------------------------------------------------------------------------------------------------------------------|
|                                              |                                                                                                             | CliniCo                                                                                                               | COVID-OLD                                                                                                             | COVID-Predict                                                                                                         |
| <b>Country</b>                               | United Kingdom                                                                                              | The Netherlands                                                                                                       | The Netherlands                                                                                                       | The Netherlands                                                                                                       |
| <b>Healthcare setting</b>                    | Hospital                                                                                                    | Hospital                                                                                                              | Hospital                                                                                                              | Hospital                                                                                                              |
| <b>Population</b>                            | <ul style="list-style-type: none"> <li>Adults (≥18 years)</li> <li>Confirmed COVID -19 diagnosis</li> </ul> | <ul style="list-style-type: none"> <li>Older population (≥70 years)</li> <li>Confirmed COVID -19 diagnosis</li> </ul> | <ul style="list-style-type: none"> <li>Older population (≥70 years)</li> <li>Confirmed COVID -19 diagnosis</li> </ul> | <ul style="list-style-type: none"> <li>Older population (≥70 years)</li> <li>Confirmed COVID -19 diagnosis</li> </ul> |
| <b>Predicted outcome and time of horizon</b> | In-hospital mortality                                                                                       | In-hospital mortality                                                                                                 | In-hospital mortality                                                                                                 | In-hospital mortality                                                                                                 |

### Reference

Knight SR, Ho A, Pius R, Buchan I, Carson G, Drake TM, Dunning J, Fairfield CJ, Gamble C, Green CA, Gupta R. Risk of patients admitted to hospital with Covid-19 using the ISARIC WHO Clinical Characterization Protocol: development and validation of the 4C Mortality score. BMJ. 9;370. <https://www.bmj.com/content/370/bmj.m3339>

### **3) NEWS2+ model**

#### Model equation

Logit(mortality) = Intercept + 0.145 x C-reactive protein - 0.232035 x estimated glomerular filtration rate + 0.088656 x neutrophils + 0.057681 x urea + 0.066401 x neutrophil-lymphocyte ratio - 0.198729 x oxygen saturation + 0.329529 x supplemental oxygen flow rate + 0.417074 x NEWS2 score + 0.279495 x age

## Comparison between derivation and validation settings

| Derivation settings                          | Validation hospital cohorts                                                                                 |                                                                                                                       |                                                                                                                       |                                                                                                                       |
|----------------------------------------------|-------------------------------------------------------------------------------------------------------------|-----------------------------------------------------------------------------------------------------------------------|-----------------------------------------------------------------------------------------------------------------------|-----------------------------------------------------------------------------------------------------------------------|
|                                              |                                                                                                             | CliniCo                                                                                                               | COVID-OLD                                                                                                             | COVID-Predict                                                                                                         |
| <b>Country</b>                               | United Kingdom                                                                                              | The Netherlands                                                                                                       | The Netherlands                                                                                                       | The Netherlands                                                                                                       |
| <b>Healthcare setting</b>                    | Hospital                                                                                                    | Hospital                                                                                                              | Hospital                                                                                                              | Hospital                                                                                                              |
| <b>Population</b>                            | <ul style="list-style-type: none"> <li>Adults (≥18 years)</li> <li>Confirmed COVID -19 diagnosis</li> </ul> | <ul style="list-style-type: none"> <li>Older population (≥70 years)</li> <li>Confirmed COVID -19 diagnosis</li> </ul> | <ul style="list-style-type: none"> <li>Older population (≥70 years)</li> <li>Confirmed COVID -19 diagnosis</li> </ul> | <ul style="list-style-type: none"> <li>Older population (≥70 years)</li> <li>Confirmed COVID -19 diagnosis</li> </ul> |
| <b>Predicted outcome and time of horizon</b> | ICU admission or mortality within 14 days of admission                                                      | In-hospital mortality                                                                                                 | In-hospital mortality                                                                                                 | In-hospital mortality                                                                                                 |

## Reference

Carr, E., Bendayan, R., Bean, D. *et al.* Evaluation and improvement of the National Early Warning Score (NEWS2) for COVID-19: a multi-hospital study. *BMC Med* **19**, 23 (2021). <https://doi.org/10.1186/s12916-020-01893-3>

## 4) Wang Clinical model

### Model equation

Logit(mortality) = -8.6 + 0.10 x age + 0.60 x history of hypertension + 1.11 x history of CHD

## Comparison between derivation and validation settings

| Derivation settings       | Validation hospital cohorts                                                                                 |                                                                                                                       |                                                                                                                       |                                                                                                                       |
|---------------------------|-------------------------------------------------------------------------------------------------------------|-----------------------------------------------------------------------------------------------------------------------|-----------------------------------------------------------------------------------------------------------------------|-----------------------------------------------------------------------------------------------------------------------|
|                           |                                                                                                             | CliniCo                                                                                                               | COVID-OLD                                                                                                             | COVID-Predict                                                                                                         |
| <b>Country</b>            | China                                                                                                       | The Netherlands                                                                                                       | The Netherlands                                                                                                       | The Netherlands                                                                                                       |
| <b>Healthcare setting</b> | Hospital                                                                                                    | Hospital                                                                                                              | Hospital                                                                                                              | Hospital                                                                                                              |
| <b>Population</b>         | <ul style="list-style-type: none"> <li>Adults (≥18 years)</li> <li>Confirmed COVID -19 diagnosis</li> </ul> | <ul style="list-style-type: none"> <li>Older population (≥70 years)</li> <li>Confirmed COVID -19 diagnosis</li> </ul> | <ul style="list-style-type: none"> <li>Older population (≥70 years)</li> <li>Confirmed COVID -19 diagnosis</li> </ul> | <ul style="list-style-type: none"> <li>Older population (≥70 years)</li> <li>Confirmed COVID -19 diagnosis</li> </ul> |

|                                              |                       |                       |                       |                       |
|----------------------------------------------|-----------------------|-----------------------|-----------------------|-----------------------|
| <b>Predicted outcome and time of horizon</b> | In-hospital mortality | In-hospital mortality | In-hospital mortality | In-hospital mortality |
|----------------------------------------------|-----------------------|-----------------------|-----------------------|-----------------------|

## Reference

Wang K, Zuo P, Liu Y, Zhang M, Zhao X, Xie S, Zhang H, Chen X, Liu C. Clinical and laboratory predictors of in-hospital mortality in patients with COVID\_19: a cohort study in Wuhan, China. 2020 May3. <https://pubmed.ncbi.nlm.nih.gov/32361723/>

## 5) Xie model

### Model equation

Logit(mortality) = -4.559 + 0.047 x age + 0.003 x Lactate dehydrogenase (U/L) - 1.094 x lymphocyte count (10<sup>9</sup>/L) - 0.098 x SPO<sub>2</sub> (%)

### Comparison between derivation and validation settings

|                                              | Derivation settings                                                                                         | Validation hospital cohorts                                                                                           |                                                                                                                       |                                                                                                                       |
|----------------------------------------------|-------------------------------------------------------------------------------------------------------------|-----------------------------------------------------------------------------------------------------------------------|-----------------------------------------------------------------------------------------------------------------------|-----------------------------------------------------------------------------------------------------------------------|
|                                              |                                                                                                             | CliniCo                                                                                                               | COVID-OLD                                                                                                             | COVID-Predict                                                                                                         |
| <b>Country</b>                               | China                                                                                                       | The Netherlands                                                                                                       | The Netherlands                                                                                                       | The Netherlands                                                                                                       |
| <b>Healthcare setting</b>                    | Hospital                                                                                                    | Hospital                                                                                                              | Hospital                                                                                                              | Hospital                                                                                                              |
| <b>Population</b>                            | <ul style="list-style-type: none"> <li>Adults (≥18 years)</li> <li>Confirmed COVID -19 diagnosis</li> </ul> | <ul style="list-style-type: none"> <li>Older population (≥70 years)</li> <li>Confirmed COVID -19 diagnosis</li> </ul> | <ul style="list-style-type: none"> <li>Older population (≥70 years)</li> <li>Confirmed COVID -19 diagnosis</li> </ul> | <ul style="list-style-type: none"> <li>Older population (≥70 years)</li> <li>Confirmed COVID -19 diagnosis</li> </ul> |
| <b>Predicted outcome and time of horizon</b> | In-hospital mortality                                                                                       | In-hospital mortality                                                                                                 | In-hospital mortality                                                                                                 | In-hospital mortality                                                                                                 |

## Reference

Xie J, Hungerford D, Chen H, Abrams ST, Li S, Wang G, Wang Y, Kang H, Bonnett L, Zheng R, Li X, Tong Z, Du B, Qiu H, Toh C-H. Development and external validation of a prognostic multivariable model on admission for hospitalized patients with COVID-19. medRxiv Cold Spring Harbor Laboratory Press; 2020; :2020.03.28.20045997 <https://www.medrxiv.org/content/10.1101/2020.03.28.20045997v2>

## 6) APACHE-II Score

APACHE-II Mortality Score = Age points<sup>1</sup> + Acute Physiology Score<sup>2</sup> + Chronic health<sup>3</sup>

### Age points<sup>1</sup>

| Age Points  | 0   | +2    | +3    | +5    | +6  |
|-------------|-----|-------|-------|-------|-----|
| Age (years) | ≤44 | 45-54 | 55-64 | 65-74 | >74 |

### Acute Physiology Score<sup>2</sup>

Acute physiology score is the sum of the 12 individual variable points: Rectal temperature, mean arterial temperature, respiratory rate, arterial blood gases (arterial pH, oxygenation), venous blood variables (hematocrit, white blood cells, potassium, and creatinine), Glasgow coma scale. –

| Physiological Variables                                                      | Physiology score points     |            |           |             |             |           |             |             |       |
|------------------------------------------------------------------------------|-----------------------------|------------|-----------|-------------|-------------|-----------|-------------|-------------|-------|
|                                                                              | +4                          | +3         | +2        | +1          | 0           | +1        | +2          | +3          | +4    |
| 1 Rectal temperature                                                         | ≥41                         | 39 – 40.9  | -         | 38.5 – 38.9 | 36 – 38.4   | 34 – 35.9 | 32 – 33.9   | 30 – 31.9   | ≤29.9 |
| 2 Mean arterial pressure (mm Hg)                                             | ≥160                        | 130 – 159  | 110 – 129 | -           | 70 – 109    | -         | 50 – 69     | -           | ≤49   |
| 3 Heart rate                                                                 | ≥180                        | 140 – 179  | 110 – 139 | -           | 70 – 109    | -         | 55 – 69     | 40 – 54     | ≤39   |
| 4 Respiratory rate                                                           | ≥50                         | 35 – 49    | -         | 25 – 34     | 12 – 24     | 10 – 11   | 6 – 9       | -           | ≤5    |
| 5 Fraction of inspired oxygen ≥0.5                                           | ≥500                        | 350 – 499  | 200 – 349 | -           | <200        | -         | -           | -           | -     |
| Oxygenation Fraction of inspired oxygen <0.5: use Partial pressure of oxygen | -                           | -          | -         | -           | >70         | 61 – 70   | -           | 55 – 60     | <55   |
| 6 Arterial pH                                                                | ≥7.7                        | 7.6 – 7.69 | -         | 7.5 – 7.59  | 7.33 – 7.39 | -         | 7.25 – 7.32 | 7.15 – 7.24 | <7.5  |
| 7 Sodium (mMol/L)                                                            | ≥180                        | 160 – 179  | 155 – 159 | 150 – 154   | 130 – 149   | -         | 120 – 129   | 111 – 119   | ≤110  |
| 8 Potassium (mMol/L)                                                         | ≥7                          | 6 – 6.9    | -         | 5.5 – 5.9   | 3.5 – 5.4   | 3 – 3.4   | 2.5 – 2.9   | -           | <2.5  |
| 9 Serum Creatinine (mg/dL)                                                   | ≥3.5                        | 2 – 3.4    | 1.5 – 1.9 | -           | 0.6 – 1.4   | -         | <0.6        | -           | -     |
| 10 Hematocrit (%)                                                            | ≥60                         | -          | 50 – 59.9 | 46 – 49.9   | 30 – 45.9   | -         | 20 – 29.9   | -           | <20   |
| 11 White blood count (in 1000s)                                              | ≥40                         | -          | 20 – 39.9 | 15 – 19.9   | 3 – 14.9    | -         | 1 – 2.9     | -           | <1    |
| 12 Glasgow Coma scale (GCS)                                                  | Score = 15 minus actual GCS |            |           |             |             |           |             |             |       |

### Chronic health<sup>3</sup>

Chronic health status points: two points if an elective postoperative patient with immunocompromise or history of severe organ insufficiency: five points for a non-operative patient or emergency post-operative patient with immunocompromise (i.e., due to chemotherapy, radiation, high dose steroid therapy, or advanced leukemia, lymphoma, or AIDS) or severe organ insufficiency (liver cirrhosis, portal hypertension, class IV heart failure, severe respiratory disease, dialysis-dependent)

### Comparison between derivation and validation settings

| Derivation settings                          |                           | Validation hospital cohorts                                                                                               |
|----------------------------------------------|---------------------------|---------------------------------------------------------------------------------------------------------------------------|
|                                              |                           | <b>COVID-OLD</b>                                                                                                          |
| <b>Country</b>                               | United States             | The Netherlands                                                                                                           |
| <b>Healthcare setting</b>                    | Hospital                  | Hospital                                                                                                                  |
| <b>Population</b>                            | Intensive care admissions | <ul style="list-style-type: none"> <li>• Older population (≥70 years)</li> <li>• Confirmed COVID -19 diagnosis</li> </ul> |
| <b>Predicted outcome and time of horizon</b> | ICU mortality             | In-hospital mortality                                                                                                     |

### Approximated in-hospital mortality risks

| APACHE II Score | Mortality risk |
|-----------------|----------------|
| 0-4             | 4%             |
| 5-9             | 8%             |
| 10-14           | 15%            |
| 15-19           | 25%            |
| 20-24           | 40%            |
| 25-29           | 55%            |
| 30-34           | 73%            |
| >34             | 85%            |

### Reference

Knaus WA, Draper EA, Wagner DP, Zimmerman JE. APACHE II: a severity of disease classification system. Crit Care Med. 1985 Oct;13(10):818-29.

## 7) CURB-65 score

### Score calculation

| Characteristics                           | No | Yes |
|-------------------------------------------|----|-----|
| Confusion                                 | 0  | +1  |
| Blood urea nitrogen >19 mg/dL (>7 mmol/L) | 0  | +1  |

|                                                      |   |    |
|------------------------------------------------------|---|----|
| Respiratory rate $\geq 30$                           | 0 | +1 |
| Systolic BP < 90 mmHg or Diastolic BP $\leq 60$ mmHg | 0 | +1 |
| Age $\geq 65$                                        | 0 | +1 |

### Comparison between derivation and validation settings

|                                              | Derivation settings                                                                                                          | Validation hospital cohorts                                                                                                            |                                                                                                                                        |                                                                                                                                        |
|----------------------------------------------|------------------------------------------------------------------------------------------------------------------------------|----------------------------------------------------------------------------------------------------------------------------------------|----------------------------------------------------------------------------------------------------------------------------------------|----------------------------------------------------------------------------------------------------------------------------------------|
|                                              |                                                                                                                              | CliniCo                                                                                                                                | COVID-OLD                                                                                                                              | COVID-Predict                                                                                                                          |
| <b>Country</b>                               | United Kingdom                                                                                                               | The Netherlands                                                                                                                        | The Netherlands                                                                                                                        | The Netherlands                                                                                                                        |
| <b>Healthcare setting</b>                    | Hospital                                                                                                                     | Hospital                                                                                                                               | Hospital                                                                                                                               | Hospital                                                                                                                               |
| <b>Population</b>                            | <ul style="list-style-type: none"> <li>Adults (<math>\geq 18</math> years)</li> <li>Confirmed COVID -19 diagnosis</li> </ul> | <ul style="list-style-type: none"> <li>Older population (<math>\geq 70</math> years)</li> <li>Confirmed COVID -19 diagnosis</li> </ul> | <ul style="list-style-type: none"> <li>Older population (<math>\geq 70</math> years)</li> <li>Confirmed COVID -19 diagnosis</li> </ul> | <ul style="list-style-type: none"> <li>Older population (<math>\geq 70</math> years)</li> <li>Confirmed COVID -19 diagnosis</li> </ul> |
| <b>Predicted outcome and time of horizon</b> | In-hospital mortality                                                                                                        | In-hospital mortality                                                                                                                  | In-hospital mortality                                                                                                                  | In-hospital mortality                                                                                                                  |

### Approximated in-hospital mortality risks

| CURB-65 score | Mortality score |
|---------------|-----------------|
| 0             | 0.6%            |
| 1             | 2.7%            |
| 2             | 6.8%            |
| 3             | 14%             |
| 4 to 5        | 27.8%           |

### Reference

W Lim, M.M van der Eerden, R Laing, W Boersma, N Karalus, G Town, S Lewis, and J Macfarlane. Defining community acquired pneumonia severity on presentation to hospital: an international derivation and validation study. Thorax. 2003 May; 58(5):377-382. Doi: 10.1136/thorax.58.5.377.



## 8) SOFA score

### Score calculation table

| Physiological parameter                                         | SOFA Score |                   |                                          |                                                                 |                                     |
|-----------------------------------------------------------------|------------|-------------------|------------------------------------------|-----------------------------------------------------------------|-------------------------------------|
|                                                                 | 0          | 1                 | 2                                        | 3                                                               | 4                                   |
| Partial pressure of oxygen / Fraction of inspired oxygen (mmHg) | ≥400       | 300-399           | 200-299                                  | 100-199 with respiratory support                                | <100 with respiratory support       |
| Platelets (10 <sup>3</sup> / μL)                                | ≥150       | 100-149           | 50-99                                    | 20-49                                                           | <20                                 |
| Bilirubin μmol/L (mg/dL)                                        | <20 (1.2)  | 20-32 (1.2-1.9)   | 33-101 (2-5.9)                           | 102-204 (6-11.9)                                                | >204 (12)                           |
| Mean arterial pressure mmHg                                     | ≥70        | <70               | Low dose dopamine or any dose dobutamine | Low-medium dose noradrenalin or adrenalin; medium dose dopamine | High dose noradrenalin, or dopamine |
| Glasgow Coma Scale score                                        | 15         | 13-14             | 10-12                                    | 6-9                                                             | <6                                  |
| Creatinine, μmol/L(mg/dL)                                       | <110 (1.2) | 110-170 (1.2-1.9) | 171-299 (2.0-3.4)                        | 300-440 (3.5-4.9)                                               | >440 (5.0)                          |
| Urine output, mL/day                                            | -          | -                 | -                                        | <500                                                            | <200                                |

### Comparison between derivation and validation settings

|                                       | Derivation settings                                                                                         | Validation hospital cohorts                                                                                           |                                                                                                                       |                                                                                                                       |
|---------------------------------------|-------------------------------------------------------------------------------------------------------------|-----------------------------------------------------------------------------------------------------------------------|-----------------------------------------------------------------------------------------------------------------------|-----------------------------------------------------------------------------------------------------------------------|
|                                       |                                                                                                             | CliniCo                                                                                                               | COVID-OLD                                                                                                             | COVID-Predict                                                                                                         |
| Country                               | Unclear                                                                                                     | The Netherlands                                                                                                       | The Netherlands                                                                                                       | The Netherlands                                                                                                       |
| Healthcare setting                    | Hospital                                                                                                    | Hospital                                                                                                              | Hospital                                                                                                              | Hospital                                                                                                              |
| Population                            | <ul style="list-style-type: none"> <li>Adults (≥18 years)</li> <li>Confirmed COVID -19 diagnosis</li> </ul> | <ul style="list-style-type: none"> <li>Older population (≥70 years)</li> <li>Confirmed COVID -19 diagnosis</li> </ul> | <ul style="list-style-type: none"> <li>Older population (≥70 years)</li> <li>Confirmed COVID -19 diagnosis</li> </ul> | <ul style="list-style-type: none"> <li>Older population (≥70 years)</li> <li>Confirmed COVID -19 diagnosis</li> </ul> |
| Predicted outcome and time of horizon | ICU mortality                                                                                               | In-hospital mortality                                                                                                 | In-hospital mortality                                                                                                 | In-hospital mortality                                                                                                 |

### Approximated in-hospital mortality risks

| <b>Mean SOFA score</b> | <b>Mortality risk</b> |
|------------------------|-----------------------|
| 0 to 1.0               | 1.2%                  |
| 1.1 to 2.0             | 5.4%                  |
| 2.1 to 3.0             | 20%                   |
| 3.1 to 4.0             | 36.1%                 |
| 4.1 to 5.0             | 73.1%                 |
| > 5.1                  | 84.4%                 |

### Reference

Vincent JL, Moreno R, Takala J, et al. The SOFA (Sepsis-related Organ Failure Assessment) score to describe organ dysfunction/failure. On behalf of the Working Group on Sepsis-Related Problems of the European Society of Intensive Care Medicine. In: Vol 22. 1996:707–710.
