# Supplementary material
Source: PubMed Central journal article supplement (PMC10071742)
Supplement: 41512_2023_144_MOESM3_ESM.pdf [file 41512_2023_144_MOESM3_ESM.pdf]

## Supplementary file 3: Predictor measurements in derivation and validation cohorts

Predictor measurements were extracted from electronic health records.

**Supplementary Table 2:** Predictor measurements in original derivation settings and validation cohorts

| Predictors                            | Derivation settings                     |                                               | Validation settings                                                                                                                             |
|---------------------------------------|-----------------------------------------|-----------------------------------------------|-------------------------------------------------------------------------------------------------------------------------------------------------|
|                                       | Unit and definition in derivation study | Timing of measurement in the derivation study | Definition and timing of measurement in primary care and nursing homes                                                                          |
| <b>GAL-COVID-19 mortality</b>         |                                         |                                               |                                                                                                                                                 |
| Age                                   | Years                                   | At admission                                  | At admission                                                                                                                                    |
| Sex                                   | At birth                                |                                               | At admission                                                                                                                                    |
| Lymphoma/leukemia/Hodgkin's disease   | ICPC-2 codes B72, B73, B74              | At PCR-confirmed covid-19 diagnosis           | <u>JHN/AHA/AHN and PHARMO:</u> ICPC codes B72, B72.01, B72.02, B73, B74<br><u>Ysis:</u> Information extracted from free text of patient history |
| Liver disease                         | ICPC-2 code D97                         | At PCR-confirmed covid-19 diagnosis           | <u>JHN/AHA/AHN and PHARMO:</u> ICPC code D87<br><u>Ysis:</u> Information extracted from free text of patient history                            |
| Dementia                              | ICPC-2 code P70                         | At PCR-confirmed covid-19 diagnosis           | <u>JHN/AHA/AHN and PHARMO:</u> ICPC code P70<br><u>Ysis:</u> Information extracted from free text of patient history                            |
| Ischemic heart disease                | ICPC-2 codes K74, K75, K76              | At PCR-confirmed covid-19 diagnosis           | <u>JHN/AHA/AHN and PHARMO:</u> ICPC K74, K75, K76<br><u>Ysis:</u> Information extracted from free text of patient history                       |
| Chronic Obstructive Pulmonary Disease | ICPC-2 code R95                         | At PCR-confirmed covid-19 diagnosis           | <u>JHN/AHA/AHN and PHARMO:</u> ICPC R95<br><u>Ysis:</u> Information extracted from free text of patient history                                 |
| Diabetes mellitus                     | ICPC-2 codes T89, T90, W85              | At PCR-confirmed covid-19 diagnosis           | <u>JHN/AHA/AHN and PHARMO:</u> ICPC T90.01, T90.02, W84.02, W84.03<br><u>Ysis:</u> Information extracted from free text of patient history      |
| Chronic kidney disease                | ICPC-2 code U99.01                      | At PCR-confirmed covid-19 diagnosis           | <u>JHN/AHA/AHN and PHARMO:</u> ICPC U99.01<br><u>Ysis:</u> Information extracted from free text of patient history                              |
| Predictors                            | Derivation settings                     |                                               | Validation settings                                                                                                                             |
|                                       | Unit and definition in derivation study | Timing of measurement in derivation study     | Definition and timing of measurement in hospital cohorts                                                                                        |
| <b>GAL-COVID-19 mortality</b>         |                                         |                                               |                                                                                                                                                 |
| Age                                   | Years                                   | At covid-19 diagnosis                         | Registered once at hospital admission                                                                                                           |

|                                              |                            |                                     |                                                                                                 |
|----------------------------------------------|----------------------------|-------------------------------------|-------------------------------------------------------------------------------------------------|
| <b>Sex</b>                                   | At birth                   |                                     | Registered once at hospital admission                                                           |
| <b>Lymphoma/leukemia/Hodgkin's disease</b>   | ICPC-2 codes B72, B73, B74 | At PCR-confirmed covid-19 diagnosis | <u>CliniCo and COVID-PREDICT</u> : Recorded in patient history under hematological malignancies |
| <b>Liver disease</b>                         | ICPC-2 code D97            | At PCR-confirmed covid-19 diagnosis | <u>CliniCo, COVID-PREDICT and COVID-OLD</u> : Registered once at hospital admission             |
| <b>Dementia</b>                              | ICPC-2 code P70            | At PCR-confirmed covid-19 diagnosis | <u>CliniCo, COVID-PREDICT and COVID-OLD</u> : Registered once at hospital admission             |
| <b>Ischemic heart disease</b>                | ICPC-2 codes K74, K75, K76 | At PCR-confirmed covid-19 diagnosis | <u>CliniCo, COVID-PREDICT and COVID-OLD</u> : Registered once at hospital admission             |
| <b>Chronic Obstructive Pulmonary Disease</b> | ICPC-2 code R95            | At PCR-confirmed covid-19 diagnosis | <u>CliniCo, COVID-PREDICT and COVID-OLD</u> : Registered once at hospital admission             |
| <b>Diabetes mellitus</b>                     | ICPC-2 codes T89, T90, W85 | At PCR-confirmed covid-19 diagnosis | <u>CliniCo, COVID-PREDICT and COVID-OLD</u> : Registered once at hospital admission             |
| <b>Chronic kidney disease</b>                | ICPC-2 code U99.01         | At PCR-confirmed covid-19 diagnosis | <u>CliniCo, COVID-PREDICT and COVID-OLD</u> : Registered once at hospital admission             |

#### 4C-Mortality Score

|                                                       |                                 |                              |                                                                                                                   |
|-------------------------------------------------------|---------------------------------|------------------------------|-------------------------------------------------------------------------------------------------------------------|
| <b>Age</b>                                            | Years                           | At hospital admission        | Registered once at hospital admission                                                                             |
| <b>Sex</b>                                            | Sex at birth                    |                              | Registered once at hospital admission                                                                             |
| <b>Chronic cardiac disease</b>                        | Not reported for original model | Day of admission to hospital | <u>CliniCo, COVID-PREDICT and COVID-OLD</u> : Registered once at hospital admission from electronic health record |
| <b>Chronic respiratory disease (excluding asthma)</b> | Not reported for original model | Day of admission to hospital | <u>CliniCo, COVID-PREDICT and COVID-OLD</u> : Registered once at hospital admission from electronic health record |
| <b>Chronic renal disease</b>                          | Not reported for original model | Day of admission to hospital | <u>CliniCo, COVID-PREDICT and COVID-OLD</u> : Registered once at hospital admission from electronic health record |
| <b>Mild to severe liver disease</b>                   | Not reported for original model | Day of admission to hospital | <u>CliniCo, COVID-PREDICT and COVID-OLD</u> : Registered once at hospital admission from electronic health record |
| <b>Dementia</b>                                       | Not reported for original model | Day of admission to hospital | <u>CliniCo, COVID-PREDICT and COVID-OLD</u> : Registered once at hospital admission from electronic health record |
| <b>Chronic neurological conditions</b>                | Not reported for original model | Day of admission to hospital | <u>CliniCo, COVID-PREDICT and COVID-OLD</u> : Registered once at hospital admission from electronic health record |

|                                                 |                                         |                              |                                                                                                                                                                                                         |
|-------------------------------------------------|-----------------------------------------|------------------------------|---------------------------------------------------------------------------------------------------------------------------------------------------------------------------------------------------------|
| <b>Connective tissue disease</b>                | Not reported for original model         | Day of admission to hospital | <u>CliniCo, COVID-PREDICT and COVID-OLD</u> : Registered once at hospital admission from electronic health record                                                                                       |
| <b>Diabetes mellitus</b>                        | Not reported for original model         | Day of admission to hospital | <u>CliniCo, COVID-PREDICT and COVID-OLD</u> : Registered once at hospital admission from electronic health record                                                                                       |
| <b>HIV or AIDS</b>                              | Not reported for original model         | Day of admission to hospital | <u>CliniCo, COVID-PREDICT and COVID-OLD</u> : Registered once at hospital admission from electronic health record                                                                                       |
| <b>Malignancy</b>                               | Not reported for original model         | Day of admission to hospital | <u>CliniCo, COVID-PREDICT and COVID-OLD</u> : Registered once at hospital admission from electronic health record                                                                                       |
| <b>Obesity</b>                                  | Clinician defined (not further defined) | Day of admission to hospital | <u>COVID-OLD and COVID-PREDICT</u> : History recorded at hospital admission<br><u>CliniCo</u> : Computed based on BMI using weight and height                                                           |
| <b>Respiratory rate</b>                         | Breaths per minute                      | Day of admission to hospital | <u>CliniCo and COVID-OLD</u> : Registered as monitoring data<br><u>COVID-OLD</u> : recorded in Modified Early Warning Score (MEWS) at admission                                                         |
| <b>Peripheral oxygen saturation on room air</b> | %                                       | Day of admission to hospital | <u>CliniCo and COVID-PREDICT</u> : Measured at hospital admission<br><u>COVID-OLD</u> : recorded in Modified Early Warning Score (MEWS) at admission                                                    |
| <b>Glasgow Coma Scale</b>                       | Score 15 or <15                         | Day of admission to hospital | <u>CliniCo</u> : Recorded by health professional at hospital admission<br>ACVPU score<br><u>COVID-OLD</u> : Recorded by health professional regularly in intensive care and hospital monitored patients |
| <b>Urea</b>                                     | Mmol/L                                  | Day of admission to hospital | Measured at hospital admission                                                                                                                                                                          |
| <b>C-reactive protein</b>                       | Mg/dL                                   | Day of admission to hospital | Measured at hospital admission                                                                                                                                                                          |
| <b>Xie model</b>                                |                                         |                              |                                                                                                                                                                                                         |
| <b>Age</b>                                      | Years                                   | Not Specified                | Registered once at hospital admission                                                                                                                                                                   |
| <b>Lactate dehydrogenase</b>                    | IU/L                                    | Not Specified                | Measured at hospital admission                                                                                                                                                                          |
| <b>lymphocyte count</b>                         | 10 <sup>9</sup> cells/L                 | Not Specified                | Measured at admission                                                                                                                                                                                   |
| <b>Oxygen saturation</b>                        | %                                       | Not Specified                | Measured at admission<br><u>COVID-OLD</u> : recorded in Modified Early Warning Score (MEWS) at admission                                                                                                |
| <b>Wang model</b>                               |                                         |                              |                                                                                                                                                                                                         |
| <b>Age</b>                                      | Years                                   | At hospital admission        | Registered once at hospital admission                                                                                                                                                                   |
| <b>History of hypertension</b>                  | Recorded at hospital admission          | At hospital admission        | Registered once at hospital admission                                                                                                                                                                   |
| <b>History of chronic heart disease</b>         | Recorded at hospital admission          | At hospital admission        | Registered once at hospital admission                                                                                                                                                                   |
| <b>NEWS2+ model</b>                             |                                         |                              |                                                                                                                                                                                                         |

|                                             |                                        |                                                                     |                                                                                                                                                                                     |
|---------------------------------------------|----------------------------------------|---------------------------------------------------------------------|-------------------------------------------------------------------------------------------------------------------------------------------------------------------------------------|
| <b>Respiratory rate</b>                     | Breaths/minute                         | First available measure up to 48 h following hospital admission     | Registered once at hospital admission<br><u>COVID-OLD</u> : recorded in Modified Early Warning Score (MEWS) at admission                                                            |
| <b>Oxygen saturation</b>                    | %                                      | First available measure up to 48 h following hospital admission     | Measured at hospital admission<br><u>COVID-OLD</u> : recorded in Modified Early Warning Score (MEWS) at admission                                                                   |
| <b>Heart rate</b>                           | Beats/minute                           | First available measure up to 48 h following hospital admission     | Registered once at hospital admission<br><u>COVID-OLD</u> : recorded in Modified Early Warning Score (MEWS) at admission                                                            |
| <b>Systolic blood pressure</b>              | mmHg                                   | First available measure up to 48 h following hospital admission     | Part of monitoring data at hospital admission                                                                                                                                       |
| <b>Body temperature</b>                     | Degree Celsius                         | First available measure up to 48 h following hospital admission     | Part of monitoring data at hospital admission<br><u>COVID-OLD</u> : recorded in Modified Early Warning Score (MEWS) at admission                                                    |
| <b>Alertness</b>                            | AVPU score                             | First available measure up to 48 h following hospital admission     | Recorded by health professional at hospital admission ACVPU score<br><u>COVID-OLD</u> : Recorded by health professional regularly in intensive care and hospital monitored patients |
| <b>Supplemental oxygen flow rate</b>        | L/min                                  | First available measure up to 48 h following hospital admission     | Reported by health professional at hospital admission<br><u>COVID-OLD</u> : recorded in Modified Early Warning Score (MEWS) at admission                                            |
| <b>Urea</b>                                 | Mmol/L                                 | First available measure up to 48 h following hospital admission     | Measured at hospital admission                                                                                                                                                      |
| <b>Age</b>                                  | Years                                  | First available measure up to 48 h following hospital admission     | Registered once at hospital admission                                                                                                                                               |
| <b>C-reactive protein</b>                   | Mg/L                                   | First available measure up to 48 h following hospital admission     | Measured at hospital admission and repeated 3-4 times a week if indicated                                                                                                           |
| <b>Estimated glomerular filtration rate</b> | ml/min                                 | First available measure up to 48 h following hospital admission     | Computed using MDRD equation using age, sex, and creatinine values                                                                                                                  |
| <b>Neutrophil count</b>                     | 10 <sup>9</sup> cells/L                | First available measure up to 48 h following hospital admission     | Measured at hospital admission and repeated 3-4 times a week if indicated                                                                                                           |
| <b>Neutrophil/lymphocyte ratio</b>          |                                        | First available measure up to 48 h following hospital admission     | Computed using serum Neutrophil and lymphocytes levels                                                                                                                              |
| <b>SOFA score</b>                           |                                        |                                                                     |                                                                                                                                                                                     |
| <b>Arterial oxygen tension</b>              | MmHg                                   | 24-hour period after the onset of infection/admission for infection | Calculated using arterial or venous blood gas test levels at hospital admission                                                                                                     |
| <b>Fraction of inspired oxygen ratio</b>    | %<br>24-hour period after the onset of | 24-hour period after the onset of                                   | Calculated using arterial oxygen partial pressure and fractional                                                                                                                    |

|                                       |                                                                                                                                                       |                                                                     |                                                                                          |
|---------------------------------------|-------------------------------------------------------------------------------------------------------------------------------------------------------|---------------------------------------------------------------------|------------------------------------------------------------------------------------------|
|                                       | infection/admission for infection                                                                                                                     | infection/admission for infection                                   | inspired oxygen measured at hospital admission                                           |
| <b>Glasgow Coma Scale</b>             | Score 15 or <15                                                                                                                                       | 24-hour period after the onset of infection/admission for infection | Recorded by health professional at hospital admission                                    |
| <b>Mean arterial pressure</b>         | MmHg                                                                                                                                                  | 24-hour period after the onset of infection/admission for infection | Computed using systolic and diastolic blood pressure measured at hospital admission      |
| <b>Administration of vasopressors</b> | Dopamine ≤5 or Dobutamine (any dose) / Dopamine >5, Epinephrine ≤0.1, or norepinephrine ≤0.1 / Dopamine >15, Epinephrine >0.1, or norepinephrine >0.1 | 24-hour period after the onset of infection/admission for infection | <u>CliniCo and COVID-OLD</u> : Patient information at admission checked for vasopressors |
| <b>Serum creatinine</b>               | mg/dL                                                                                                                                                 | 24-hour period after the onset of infection/admission for infection | Measured at hospital admission                                                           |
| <b>Bilirubin</b>                      | mg/dL                                                                                                                                                 | 24-hour period after the onset of infection/admission for infection | Measured at hospital admission                                                           |
| <b>Platelet count</b>                 | 10 <sup>9</sup> cells/L                                                                                                                               | 24-hour period after the onset of infection/admission for infection | Measured at hospital admission                                                           |

#### APACHE-II Score

|                                |                                   |                                                               |                                                                                                                                  |
|--------------------------------|-----------------------------------|---------------------------------------------------------------|----------------------------------------------------------------------------------------------------------------------------------|
| <b>Body temperature</b>        | Rectal temperature degree Celsius | The worst parameters in the first 24 hours of hospitalization | Part of monitoring data at hospital admission<br><u>COVID-OLD</u> : recorded in Modified Early Warning Score (MEWS) at admission |
| <b>Heart rate</b>              | Beats/minute                      | The worst parameters in the first 24 hours of hospitalization | Part of monitoring data at hospital admission<br><u>COVID-OLD</u> : recorded in Modified Early Warning Score (MEWS) at admission |
| <b>Breathing rate</b>          | Breaths/minute                    | The worst parameters in the first 24 hours of hospitalization | Part of monitoring data at hospital admission                                                                                    |
| <b>Mean arterial pressure</b>  | MmHg                              | The worst parameters in the first 24 hours of hospitalization | Computed using systolic and diastolic arterial pressure                                                                          |
| <b>Arterial oxygen tension</b> | MmHg                              | The worst parameters in the first 24 hours of hospitalization | Calculated using arterial or venous blood gas test levels at hospital admission                                                  |
| <b>pH</b>                      |                                   | The worst parameters in the first 24 hours of hospitalization | Measured at hospital admission                                                                                                   |
| <b>Potassium</b>               | Mmol/L                            | The worst parameters in the first 24 hours of hospitalization | Measured at hospital admission                                                                                                   |
| <b>Sodium</b>                  | Mmol/L                            | The worst parameters in the first 24 hours of hospitalization | Measured at hospital admission                                                                                                   |
| <b>Creatinine</b>              | Micromol/L                        | The worst parameters in the first 24 hours of hospitalization | Measured at hospital admission                                                                                                   |

|                                  |                                                                                                                              |                                                                     |                                                                                                                |
|----------------------------------|------------------------------------------------------------------------------------------------------------------------------|---------------------------------------------------------------------|----------------------------------------------------------------------------------------------------------------|
| <b>Haematocrit</b>               | %                                                                                                                            | The worst parameters in the first 24 hours of hospitalization       | Measured at hospital admission<br><u>COVID-PREDICT</u> : Not measured                                          |
| <b>Leucocyte count</b>           | 10 <sup>9</sup> cells/L                                                                                                      | The worst parameters in the first 24 hours of hospitalization       | Measured at hospital admission                                                                                 |
| <b>Glasgow Coma Scale</b>        | Score 15 or <15                                                                                                              | The worst parameters in the first 24 hours of hospitalization       | <u>COVID-OLD</u> : Recorded by health professional regularly in intensive care and hospital monitored patients |
| <b>Age</b>                       | Years                                                                                                                        | The worst parameters in the first 24 hours of hospitalization       | Registered once at hospital admission                                                                          |
| <b>Chronic health evaluation</b> | Binary: history of surgery, history of organ insufficiency, immunocompromised state                                          | 24-hour period after the onset of infection/admission for infection | Recorded once by health professional at hospital admission<br><u>COVID-PREDICT</u> : Not measured              |
| <b>CURB-65 Score</b>             |                                                                                                                              |                                                                     |                                                                                                                |
| <b>Alertness</b>                 | AVPU score<br>AVPU, Alert vs. Confused/not alert (ACVPU classification, where A is alert, and CVPU are grouped as one score) | Not reported for original model                                     | Recorded by health professional at hospital admission or AVPU score in cohorts                                 |
| <b>Urea</b>                      | Mmol/L                                                                                                                       | Not reported for original model                                     | Measured at hospital admission                                                                                 |
| <b>Respiratory rate</b>          | Breaths/minute                                                                                                               | Not reported for original model                                     | Part of monitoring data at hospital admission                                                                  |
| <b>Systolic blood pressure</b>   | MmHg                                                                                                                         | Not reported for original model                                     | Part of monitoring data at hospital admission                                                                  |
| <b>Diastolic blood pressure</b>  | MmHg                                                                                                                         | Not reported for original model                                     | Part of monitoring data at hospital admission                                                                  |
| <b>Age</b>                       | Years                                                                                                                        | Not reported for original model                                     | Registered once at hospital admission                                                                          |
