# Supplementary material
Source: PubMed Central journal article supplement (PMC10071742)
Supplement: 41512_2023_144_MOESM4_ESM.pdf [file 41512_2023_144_MOESM4_ESM.pdf]

## Supplementary file 4: TRIPOD checklist for validation of prediction model

**Supplementary table 3:** TRIPOD checklist for the current external validation study of COVID-19 prognostic models in different healthcare settings

| Section/Topic                       | Checklist Item                                                                                                                                                                                      | Page              |
|-------------------------------------|-----------------------------------------------------------------------------------------------------------------------------------------------------------------------------------------------------|-------------------|
| <b>Title and abstract</b>           |                                                                                                                                                                                                     |                   |
| <b>Title</b>                        | 1 Identify the study as developing and/or validating a multivariable prediction model, the target population, and the outcome to be predicted.                                                      | 1                 |
| <b>Abstract</b>                     | 2 Provide a summary of objectives, study design, setting, participants, sample size, predictors, outcome, statistical analysis, results, and conclusions.                                           | 2                 |
| <b>Introduction</b>                 |                                                                                                                                                                                                     |                   |
| <b>Background and objectives</b>    | 3a Explain the medical context (including whether diagnostic or prognostic) and rationale for developing or validating the multivariable prediction model, including references to existing models. | 3                 |
|                                     | 3b Specify the objectives, including whether the study describes the development or validation of the model or both.                                                                                | 3                 |
| <b>Methods</b>                      |                                                                                                                                                                                                     |                   |
| <b>Source of data</b>               | 4a Describe the study design or source of data (e.g., randomized trial, cohort, or registry data), separately for the development and validation data sets, if applicable.                          | 4                 |
|                                     | 4b Specify the key study dates, including start of accrual; end of accrual; and, if applicable, end of follow-up.                                                                                   | 4                 |
| <b>Participants</b>                 | 5a Specify key elements of the study setting (e.g., primary care, secondary care, general population) including number and location of centres.                                                     | 4<br>Table 2      |
|                                     | 5b Describe eligibility criteria for participants.                                                                                                                                                  | 4                 |
|                                     | 5c Give details of treatments received, if relevant.                                                                                                                                                | NA                |
| <b>Outcome</b>                      | 6a Clearly define the outcome that is predicted by the prediction model, including how and when assessed.                                                                                           | 5                 |
|                                     | 6b Report any actions to blind assessment of the outcome to be predicted.                                                                                                                           | 5                 |
| <b>Predictors</b>                   | 7a Clearly define all predictors used in developing or validating the multivariable prediction model, including how and when they were measured.                                                    | 5                 |
|                                     | 7b Report any actions to blind assessment of predictors for the outcome and other predictors.                                                                                                       | NA                |
| <b>Sample size</b>                  | 8 Explain how the study size was arrived at.                                                                                                                                                        | 7                 |
| <b>Missing data</b>                 | 9 Describe how missing data were handled (e.g., complete-case analysis, single imputation, multiple imputation) with details of any imputation method.                                              | 6                 |
| <b>Statistical analysis methods</b> | 10c For validation, describe how the predictions were calculated.                                                                                                                                   | 5<br>Supplement 3 |
|                                     | 10d Specify all measures used to assess model performance and, if relevant, to compare multiple models.                                                                                             | 6                 |
|                                     | 10e Describe any model updating (e.g., recalibration) arising from the validation, if done.                                                                                                         | 7                 |
| <b>Risk groups</b>                  | 11 Provide details on how risk groups were created, if done.                                                                                                                                        | NA                |
| <b>Development vs. validation</b>   | 12 For validation, identify any differences from the development data in setting, eligibility criteria, outcome, and predictors.                                                                    | 6<br>supplement 3 |

| <b>Results</b>                   |     |                                                                                                                                                                                                       |       |
|----------------------------------|-----|-------------------------------------------------------------------------------------------------------------------------------------------------------------------------------------------------------|-------|
| <b>Participants</b>              | 13a | Describe the flow of participants through the study, including the number of participants with and without the outcome and, if applicable, a summary of the follow-up time. A diagram may be helpful. | NA    |
|                                  | 13b | Describe the characteristics of the participants (basic demographics, clinical features, available predictors), including the number of participants with missing data for predictors and outcome.    | NA    |
|                                  | 13c | For validation, show a comparison with the development data of the distribution of important variables (demographics, predictors and outcome).                                                        | NA    |
| <b>Model performance</b>         | 16  | Report performance measures (with CIs) for the prediction model.                                                                                                                                      | NA    |
| <b>Model-updating</b>            | 17  | If done, report the results from any model updating (i.e., model specification, model performance).                                                                                                   | NA    |
| <b>Discussion</b>                |     |                                                                                                                                                                                                       |       |
| <b>Limitations</b>               | 18  | Discuss any limitations of the study (such as nonrepresentative sample, few events per predictor, missing data).                                                                                      | 8     |
| <b>Interpretation</b>            | 19a | For validation, discuss the results with reference to performance in the development data, and any other validation data.                                                                             | 8     |
|                                  | 19b | Give an overall interpretation of the results, considering objectives, limitations, results from similar studies, and other relevant evidence.                                                        | 8     |
| <b>Implications</b>              | 20  | Discuss the potential clinical use of the model and implications for future research.                                                                                                                 | 9     |
| <b>Other information</b>         |     |                                                                                                                                                                                                       |       |
| <b>Supplementary information</b> | 21  | Provide information about the availability of supplementary resources, such as study protocol, Web calculator, and data sets.                                                                         | 17-38 |
| <b>Funding</b>                   | 22  | Give the source of funding and the role of the funders for the present study.                                                                                                                         | 9     |
